# Supplementary material for: CAD/POLD2 gene expression is associated with poor overall survival and chemoresistance in bladder urothelial carcinoma
Source: PubMed Central journal article supplement (PMC6049856; doi:10.18632/oncotarget.25701), 2018-07-03
Supplement: oncotarget-09-29743-s001.pdf [file oncotarget-09-29743-s001.pdf]

## CAD/POLD2 gene expression is associated with poor overall survival and chemoresistance in bladder urothelial carcinoma

### SUPPLEMENTARY MATERIALS

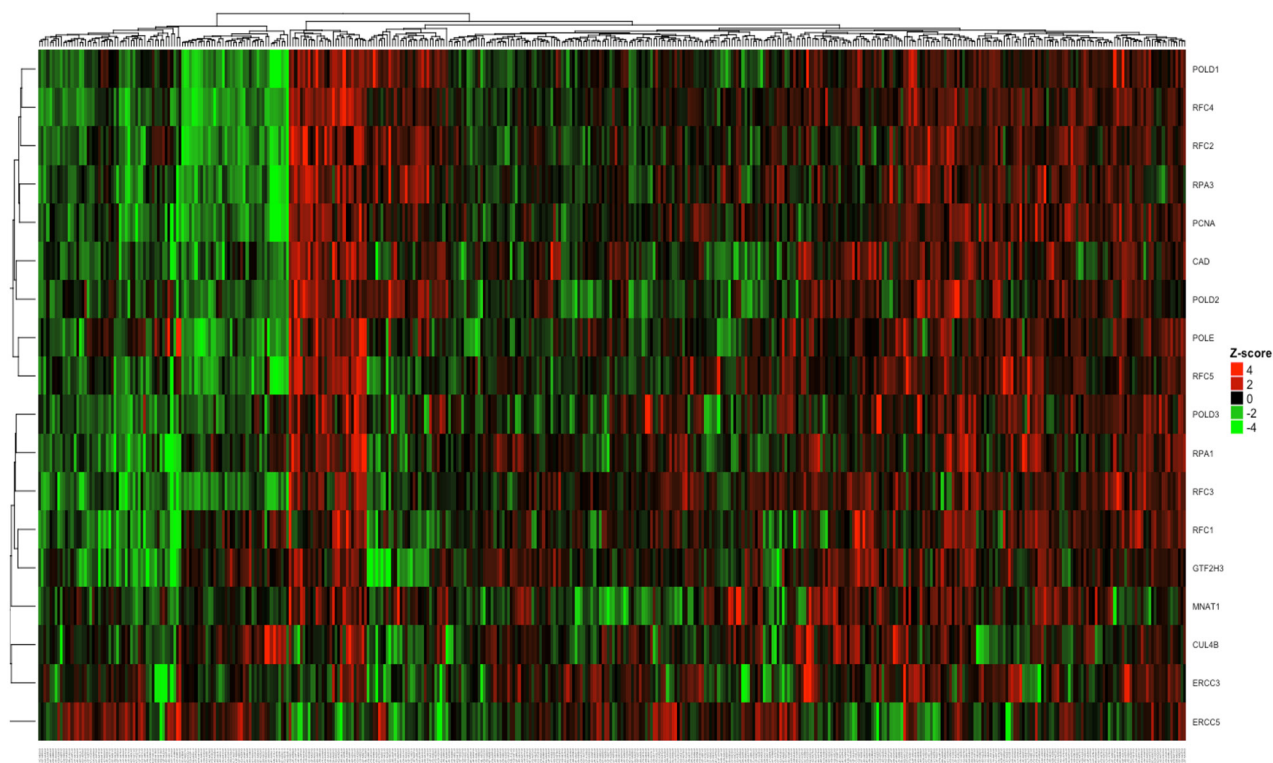

**Supplementary Figure 1: Heatmap clustering of CAD and CAD-associated nucleotide excision repair genes in TCGA BLCA patient tumor samples.** Hierarchical clustering of the 17 co-alteration/mutual-exclusive NER genes and CAD to visualize clusters by patient expression z-scores. Columns correspond to TCGA patients and rows correspond to genes.

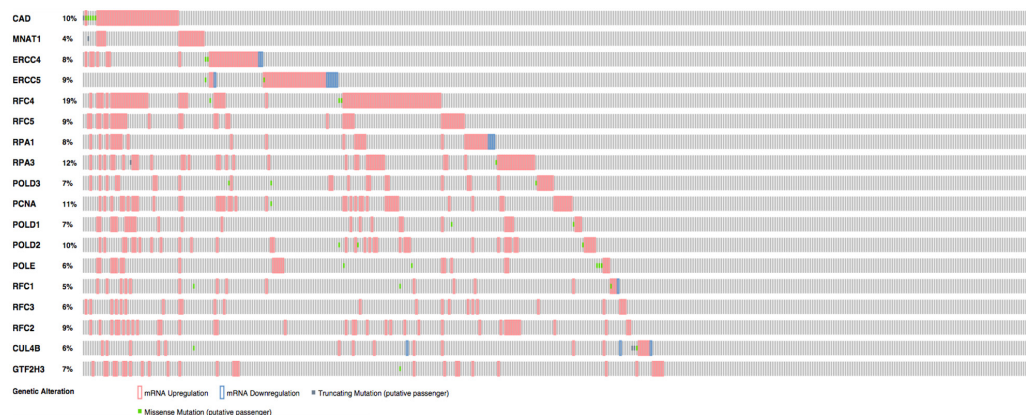

**Supplementary Figure 2: OncoPrint visualization of CAD and CAD-associated nucleotide excision repair genes in TCGA BLCA patient tumor samples.** OncoPrint results from cBioPortal for CAD and 17 co-altered/mutually-exclusive NER genes in TCGA samples.

**Supplementary Table 1: CAD co-alteration analysis with the nucleotide excision repair pathway**

| <b>Gene A</b> | <b>Gene B</b> | <b>p-Value</b> | <b>Log Odds Ratio</b> | <b>Association</b>                     |
|---------------|---------------|----------------|-----------------------|----------------------------------------|
| CAD           | MNAT1         | 0.009172906    | 1.499132138           | Tendency towards co-occurrence         |
| CAD           | ERCC3         | 0.025363905    | 0.852173175           | Tendency towards co-occurrence         |
| CAD           | ERCC5         | 0.024046249    | -1.834319084          | Tendency towards mutual<br>exclusivity |
| CAD           | RFC4          | 2.22E-06       | 1.542470638           | Tendency towards co-occurrence         |
| CAD           | RFC5          | 1.05E-05       | 1.746639034           | Tendency towards co-occurrence         |
| CAD           | RPA1          | 0.033659832    | 0.882500409           | Tendency towards co-occurrence         |
| CAD           | RPA3          | 0.008758494    | 0.965561781           | Tendency towards co-occurrence         |
| CAD           | POLD3         | 0.014035124    | 1.073294481           | Tendency towards co-occurrence         |
| CAD           | PCNA          | 0.004450951    | 1.114698426           | Tendency towards co-occurrence         |
| CAD           | POLD1         | 2.79E-05       | 1.774638428           | Tendency towards co-occurrence         |
| CAD           | POLD2         | 0.019814681    | 0.944634261           | Tendency towards co-occurrence         |
| CAD           | POLE          | 0.016617056    | 1.109637759           | Tendency towards co-occurrence         |
| CAD           | RFC1          | 0.009096674    | 1.355262252           | Tendency towards co-occurrence         |
| CAD           | RFC3          | 0.006386313    | 1.163269511           | Tendency towards co-occurrence         |
| CAD           | RFC2          | 0.000535725    | 1.438938095           | Tendency towards co-occurrence         |
| CAD           | CUL4B         | 0.023967257    | 1.107345969           | Tendency towards co-occurrence         |
| CAD           | GTF2H3        | 7.79E-05       | 1.718898121           | Tendency towards co-occurrence         |

cBioPortal co-alteration/mutual-exclusivity results for CAD and the genes in the Kegg NER pathway. Analysis accounted for mRNA upregulation/downregulation, missense mutations, and nonsense mutations in TCGA samples. 17 NER genes were significantly co-altered with CAD.

**Supplementary Table 2: Prognostic results of the CAD-associated nucleotide excision repair genes**

| <b>Gene</b>   | <b>Discovery Set<br/>HR (95% CI)</b> | <b>P-value</b> | <b>Regression coefficient</b> |
|---------------|--------------------------------------|----------------|-------------------------------|
| <i>MNAT1</i>  | 1.27 (0.94-1.71)                     | 0.120          | 0.43                          |
| <i>ERCC3*</i> | 1.45 (1.07-1.96)                     | 0.015*         | -0.437                        |
| <i>ERCC5*</i> | 1.68 (1.24-2.27)                     | 0.0008*        | -1.251                        |
| <i>RFC4</i>   | 0.97 (0.72-1.31)                     | 0.856          | 0.01                          |
| <i>RFC5</i>   | 1.15 (0.85-1.55)                     | 0.356          | -0.217                        |
| <i>RPA1</i>   | 1.32 (0.98-1.78)                     | 0.072          | 0.71                          |
| <i>RPA3</i>   | 0.88 (0.65-1.19)                     | 0.392          | -0.05                         |
| <i>POLD3</i>  | 1.03 (0.77-1.39)                     | 0.828          | 0.025                         |
| <i>PCNA</i>   | 1.29 (0.96-1.74)                     | 0.092          | -0.257                        |
| <i>POLD1</i>  | 1.12 (0.83-1.52)                     | 0.440          | -0.306                        |
| <i>POLD2*</i> | 1.4 (1.04-1.89)                      | 0.023*         | 0.715                         |
| <i>POLE</i>   | 1.12 (0.83-1.5)                      | 0.474          | -0.315                        |
| <i>RFC1</i>   | 1.03 (0.76-1.39)                     | 0.859          | 0.097                         |
| <i>RFC3</i>   | 1.05 (0.78-1.42)                     | 0.732          | 0.122                         |
| <i>RFC2</i>   | 0.94 (0.7-1.27)                      | 0.694          | 0.234                         |
| <i>CUL4B</i>  | 1.08 (0.8-1.46)                      | 0.606          | 0.263                         |
| <i>GTF2H3</i> | 1.22 (0.91-1.65)                     | 0.190          | 0.175                         |

Abbreviations: CI, confidence interval; HR, hazard ratio for risk group; \* indicates significance ( $P < 0.05$ ).

Cox model results for each of the CAD-associated NER genes in the Kegg NER pathway. ERCC3, ERCC5, and POLD2 each held prognostic significance ( $P = 0.015$ ,  $P = 0.008$ ,  $P = 0.023$ , respectively).

**Supplementary Table 3: Multivariate prognostic analysis results of CAD and POLD2 expression**

| <b>Gene</b>  | <b>Discovery Set<br/>HR (95% CI)</b> | <b>P-value</b> | <b>Regression coefficient</b> |
|--------------|--------------------------------------|----------------|-------------------------------|
| <i>POLD2</i> | 1.52 (1.12-2.08)                     | 0.007*         | 0.42                          |
| <i>CAD</i>   | 1.28 (0.95-1.75)                     | 0.106          | 0.25                          |

Multivariate model results for CAD/POLD2 gene expression in TCGA dataset.
